# Supplementary material for: Design and thermophysical characterization of betaine hydrochloride-based deep eutectic solvents as a new platform for CO2 capture
Source: Royal Society of Chemistry journal article supplement (doi:10.1039/d1nj05373f), 2022-01-01
Supplement: d1nj05373f1.pdf [file d1nj05373f1.pdf]

*Supplementary information for*

**Design and thermophysical characterization of Betaine hydrochloride-based Deep Eutectic Solvents as a new platform for CO<sub>2</sub> capturing**

Anil Kumar Jangir<sup>a</sup>, Bhawna<sup>b</sup>, Gunjan Verma<sup>c, d</sup>, Siddharth Pandey<sup>b</sup>, Ketan Kuperkar\*<sup>a</sup>

<sup>a</sup>*Department of Chemistry, Sardar Vallabhbhai National Institute of Technology (SVNIT),  
Ichchhanath, Surat-395 007, Gujarat – INDIA.*

<sup>b</sup>*Department of Chemistry, Indian Institute of Technology Delhi, Hauz Khas, New Delhi 110016, INDIA*

<sup>c</sup>*Chemistry Division, Bhabha Atomic Research Centre, Mumbai, 400 085, INDIA*

<sup>d</sup>*Homi Bhabha National Institute, Anushaktinagar, Mumbai, 400 094, INDIA.*

**Corresponding author e-mail: [ketankuperkar@gmail.com](mailto:ketankuperkar@gmail.com)**

**Table S1:** Influence of varying molar ratio of HBA and HBDs on the freezing point ( $T_f$ ) of DES.

| <b>HBA: HBD<sub>1</sub>:HBD<sub>2</sub></b> | <b>Ratio</b> | <b><math>T_f</math> (°C)</b> | <b>Remarks</b>         |
|---------------------------------------------|--------------|------------------------------|------------------------|
| BHC: U                                      | 1:1          | Do not form DES              | -                      |
|                                             | 1:2          | Do not form DES              | -                      |
|                                             | 1:3          | 80                           | -                      |
|                                             | 1:4          | 35                           | -                      |
|                                             | 1:5          | 50                           | -                      |
|                                             | 1:6          | 60                           | -                      |
| BHC: U: EG                                  | 1:4:0.5      | 32                           | Become solid after 24h |
|                                             | 1:4:1.0      | 30                           | Become solid after 24h |
|                                             | 1:4:1.5      | 28                           | Become solid after 24h |
|                                             | 1:4:2.0      | 26                           | Clear and stable       |
|                                             | 1:4:2.5      | 18                           | Clear and stable       |
| BHC: U: DEG                                 | 1:4:0.5      | 31                           | Become solid after 24h |
|                                             | 1:4:1.0      | 26                           | Become solid after 24h |
|                                             | 1:4:1.5      | 22                           | Become solid after 24h |
|                                             | 1:4:2.0      | 18                           | Become solid after 24h |
|                                             | 1:4:2.5      | 15                           | Clear and stable       |
| BHC: U: TEG                                 | 1:4:0.5      | 28                           | Become solid after 24h |
|                                             | 1:4:1.0      | 24                           | Become solid after 24h |
|                                             | 1:4:1.5      | 19                           | Become solid after 24h |
|                                             | 1:4:2.0      | 16                           | Become solid after 24h |
|                                             | 1:4:2.5      | 10                           | Clear and stable       |
| BHC: U: GLY                                 | 1:4:0.5      | 25                           | Become solid after 24h |
|                                             | 1:4:1.0      | 22                           | Become solid after 24h |
|                                             | 1:4:1.5      | 15                           | Become solid after 24h |
|                                             | 1:4:2.0      | 10                           | Clear and stable       |
|                                             | 1:4:2.5      | > 0                          | Clear and stable       |

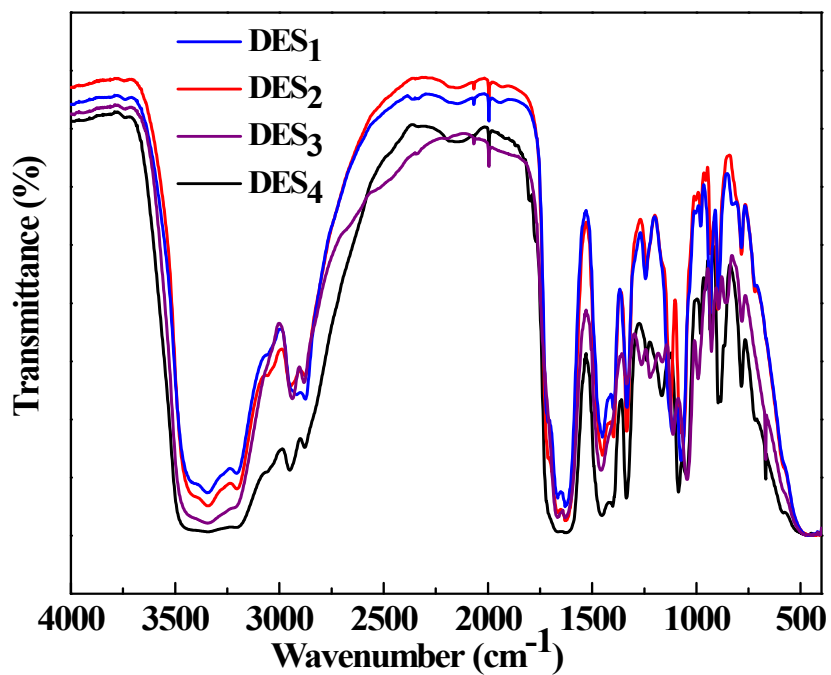

**Fig. S1:** FT-IR spectra of prepared DESs. Blue, Red, Purple, and Black lines represent: DES<sub>1</sub>, DES<sub>2</sub>, DES<sub>3</sub>, and DES<sub>4</sub> respectively.

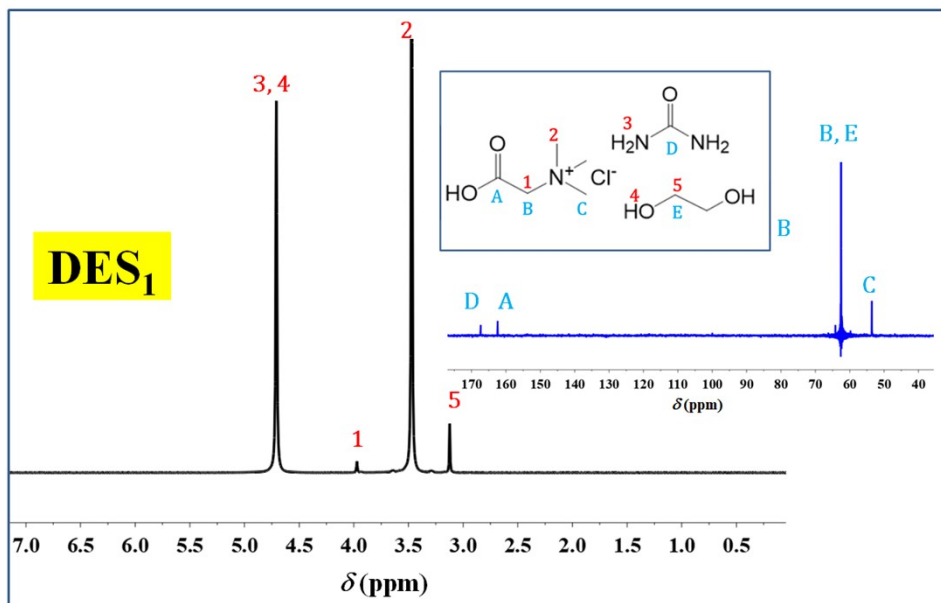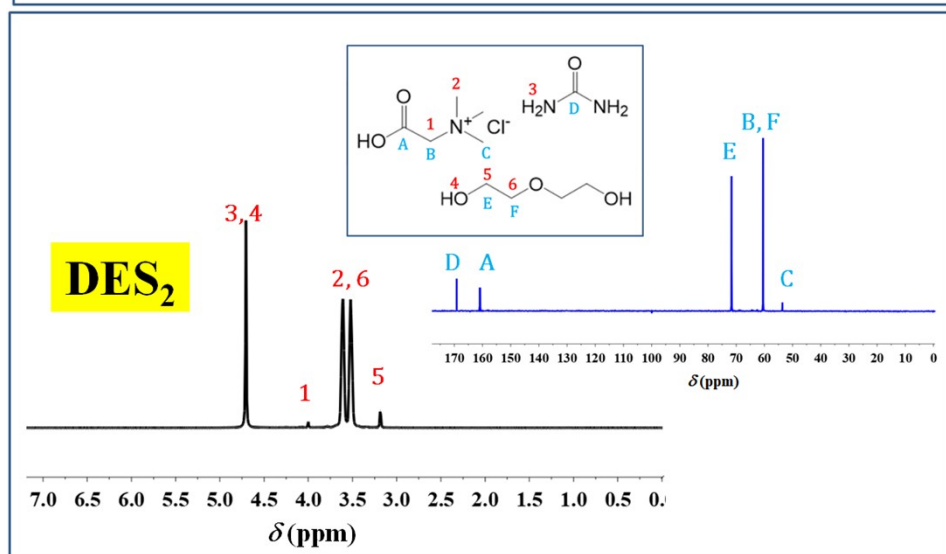

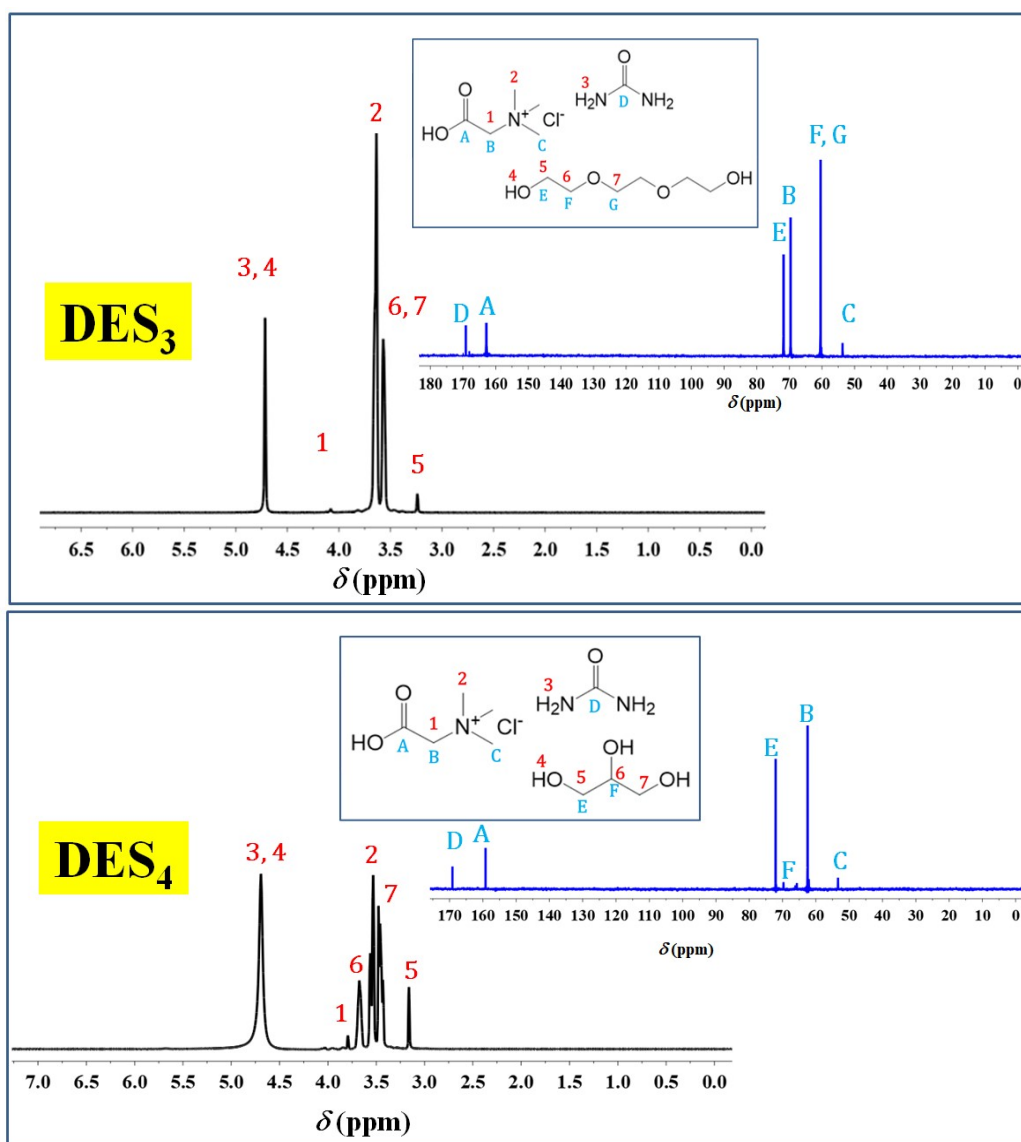

**Fig. S2:** Spectroscopic data of <sup>1</sup>H (black color spectrum) and <sup>13</sup>C-NMR (blue color spectrum) of the prepared DESs.

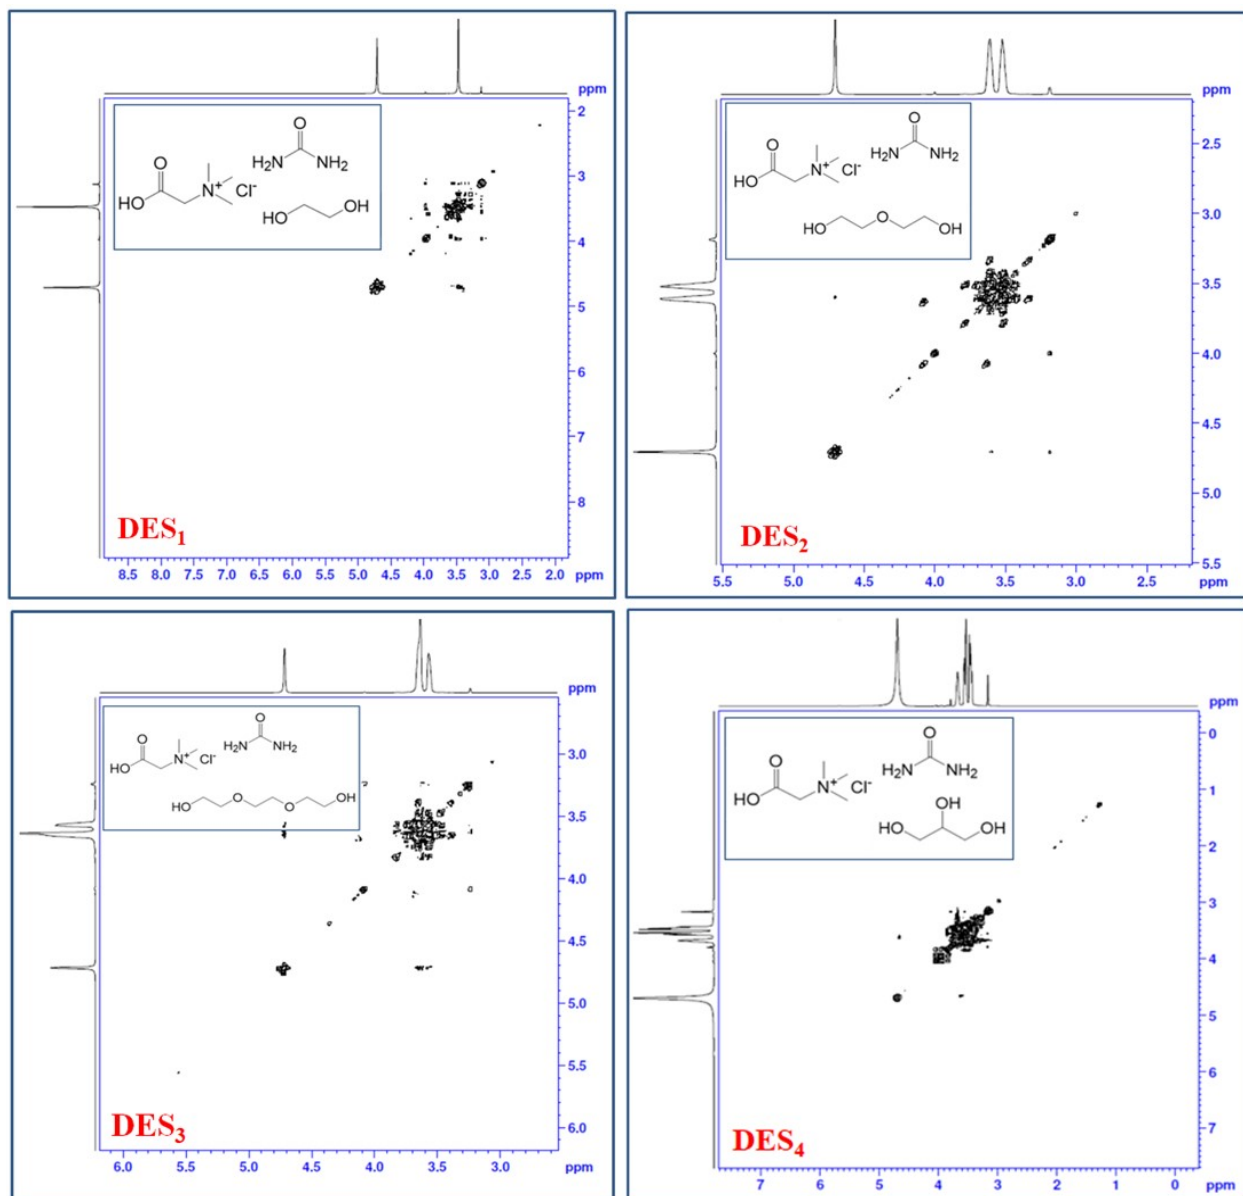

**Fig. S3:** The Experimental 2D-NOESY spectra of the prepared DESs.

**Table S2:** The experimental and evaluated thermophysical properties such as density ( $\rho$ ) thermal expansion coefficient ( $\alpha_p$ ), speed of sound ( $u$ ), isentropic compressibility ( $\kappa_s$ ), viscosity ( $\eta$ ), electrical conductivity ( $\kappa$ ), the prepared DESs at the temperature, T (K) = (303.15 - 333.15) and pressure, p=101 kPa.<sup>a</sup>

| T (K)                    | $\rho$ (g.cm <sup>-3</sup> ) |                  |                  |                  | $\alpha_p \times 10^{-4}$ (K <sup>-1</sup> ) |                  |                  |                  |
|--------------------------|------------------------------|------------------|------------------|------------------|----------------------------------------------|------------------|------------------|------------------|
|                          | DES <sub>1</sub>             | DES <sub>2</sub> | DES <sub>3</sub> | DES <sub>4</sub> | DES <sub>1</sub>                             | DES <sub>2</sub> | DES <sub>3</sub> | DES <sub>4</sub> |
| 303.15                   | 1.2038                       | 1.2100           | 1.2184           | 1.2640           | 4.97                                         | 5.03             | 5.09             | 6.28             |
| 308.15                   | 1.2005                       | 1.2064           | 1.2153           | 1.2601           | 4.99                                         | 5.05             | 5.10             | 6.30             |
| 313.15                   | 1.1979                       | 1.2031           | 1.2121           | 1.2561           | 5.00                                         | 5.06             | 5.11             | 6.32             |
| 318.15                   | 1.1942                       | 1.2001           | 1.2090           | 1.2522           | 5.01                                         | 5.07             | 5.12             | 6.34             |
| 323.15                   | 1.1913                       | 1.1972           | 1.2059           | 1.2481           | 5.02                                         | 5.08             | 5.14             | 6.36             |
| 328.15                   | 1.1887                       | 1.1942           | 1.2027           | 1.2444           | 5.04                                         | 5.10             | 5.15             | 6.38             |
| 333.15                   | 1.1854                       | 1.1912           | 1.1997           | 1.2411           | 5.05                                         | 5.11             | 5.16             | 6.40             |
| $u$ (m.s <sup>-1</sup> ) |                              |                  |                  |                  | $\kappa_s$ (TPa <sup>-1</sup> )              |                  |                  |                  |
| 303.15                   | 1874.29                      | 1855.13          | 1849.14          | 1954.89          | 236.4                                        | 240.1            | 240.0            | 207.0            |
| 308.15                   | 1864.85                      | 1844.23          | 1838.45          | 1945.65          | 239.5                                        | 243.7            | 243.4            | 209.6            |
| 313.15                   | 1855.53                      | 1834.63          | 1827.56          | 1936.45          | 242.4                                        | 246.9            | 247.0            | 212.3            |
| 318.15                   | 1846.20                      | 1824.58          | 1817.45          | 1925.26          | 245.6                                        | 250.2            | 250.4            | 215.4            |
| 323.15                   | 1836.86                      | 1814.63          | 1807.46          | 1914.23          | 248.7                                        | 253.6            | 253.8            | 218.6            |
| 328.15                   | 1827.65                      | 1804.87          | 1796.14          | 1903.56          | 251.8                                        | 257.0            | 257.7            | 221.7            |
| 333.15                   | 1818.17                      | 1794.25          | 1785.45          | 1894.23          | 255.1                                        | 260.7            | 261.4            | 224.5            |
| $\eta$ (mPa.s)           |                              |                  |                  |                  | $\kappa$ (mS. cm <sup>-1</sup> )             |                  |                  |                  |
| 303.15                   | 149.46                       | 489.02           | 812.19           | 1017.02          | 3.17                                         | 0.97             | 0.51             | 0.22             |
| 308.15                   | 96.66                        | 312.37           | 539.82           | 715.48           | 3.74                                         | 1.21             | 0.65             | 0.31             |
| 313.15                   | 70.10                        | 212.55           | 342.41           | 448.82           | 4.31                                         | 1.51             | 0.87             | 0.44             |
| 318.15                   | 54.27                        | 140.21           | 218.59           | 282.30           | 5.01                                         | 1.88             | 1.12             | 0.62             |
| 323.15                   | 41.56                        | 100.66           | 142.43           | 189.68           | 5.76                                         | 2.27             | 1.48             | 0.88             |
| 328.15                   | 32.55                        | 74.99            | 101.46           | 121.10           | 6.62                                         | 2.68             | 1.88             | 1.31             |
| 333.15                   | 27.45                        | 55.06            | 73.04            | 85.41            | 7.48                                         | 3.32             | 2.39             | 1.88             |

<sup>a</sup>Relative uncertainties ( $u$ ) expressed in terms of temperature as  $u(T)$  for  $\rho$  and  $u = \pm 0.01$  K;  $u(T)$  for  $\eta$  and  $^{nD} = \pm 0.02$  K; for  $u(\rho) = \pm 1.1$  kg. m<sup>-3</sup>; for  $u(u) = \pm 0.5$  m. s<sup>-1</sup>; for  $u(\kappa_s) = \pm 0.5$  TPa<sup>-1</sup>; for  $u(\eta) = \pm 1.0$  %; for  $u(\kappa) = \pm 1.0$  %; for  $u(^{nD}) = \pm 0.0004$  and for  $u(p) = \pm 1.0$  kPa.

**Table S3.** Experimental values of refractive index ( $n_D$ ), Molar volume ( $V_m$ ), Molar refractions ( $R_m$ ) and Free volume ( $f_m$ ) for synthesized DES at Temp.(T = 303.15-333.15 K) and pressure, p=101 kPa.<sup>a</sup>

| T (K)                  | $n_D$  | $V_m$<br>cm <sup>3</sup> .mol <sup>-1</sup> | $R_m$<br>cm <sup>3</sup> .mol <sup>-1</sup> | $f_m$<br>cm <sup>3</sup> .mol <sup>-1</sup> | $n_D$                  | $V_m$<br>cm <sup>3</sup> .mol <sup>-1</sup> | $R_m$<br>cm <sup>3</sup> .mol <sup>-1</sup> | $f_m$<br>cm <sup>3</sup> .mol <sup>-1</sup> |
|------------------------|--------|---------------------------------------------|---------------------------------------------|---------------------------------------------|------------------------|---------------------------------------------|---------------------------------------------|---------------------------------------------|
| <b>DES<sub>1</sub></b> |        |                                             |                                             |                                             | <b>DES<sub>2</sub></b> |                                             |                                             |                                             |
| 303.15                 | 1.4882 | 456.07                                      | 131.45                                      | 324.63                                      | 1.4844                 | 544.76                                      | 155.96                                      | 388.80                                      |
| 308.15                 | 1.4862 | 457.31                                      | 131.34                                      | 325.97                                      | 1.4822                 | 546.36                                      | 155.82                                      | 390.55                                      |
| 313.15                 | 1.4836 | 458.34                                      | 131.04                                      | 327.30                                      | 1.4801                 | 547.90                                      | 155.67                                      | 392.22                                      |
| 318.15                 | 1.4812 | 459.73                                      | 130.88                                      | 328.85                                      | 1.4781                 | 549.24                                      | 155.50                                      | 393.74                                      |
| 323.15                 | 1.4785 | 460.84                                      | 130.57                                      | 330.28                                      | 1.4758                 | 550.57                                      | 155.23                                      | 395.34                                      |
| 328.15                 | 1.4761 | 461.85                                      | 130.29                                      | 331.56                                      | 1.4735                 | 551.94                                      | 154.98                                      | 396.97                                      |
| 333.15                 | 1.4736 | 463.14                                      | 130.06                                      | 333.07                                      | 1.4718                 | 553.34                                      | 154.89                                      | 398.45                                      |
| <b>DES<sub>3</sub></b> |        |                                             |                                             |                                             | <b>DES<sub>4</sub></b> |                                             |                                             |                                             |
| 303.15                 | 1.4827 | 631.40                                      | 180.23                                      | 451.17                                      | 1.5018                 | 493.75                                      | 145.66                                      | 348.09                                      |
| 308.15                 | 1.4804 | 633.02                                      | 179.95                                      | 453.06                                      | 1.4994                 | 495.25                                      | 145.51                                      | 349.74                                      |
| 313.15                 | 1.4781 | 634.64                                      | 179.68                                      | 454.96                                      | 1.4971                 | 496.85                                      | 145.41                                      | 351.44                                      |
| 318.15                 | 1.4758 | 636.27                                      | 179.40                                      | 456.88                                      | 1.4947                 | 498.37                                      | 145.26                                      | 353.11                                      |
| 323.15                 | 1.4734 | 637.91                                      | 179.08                                      | 458.83                                      | 1.4922                 | 500.01                                      | 145.11                                      | 354.90                                      |
| 328.15                 | 1.4712 | 639.61                                      | 178.84                                      | 460.77                                      | 1.4898                 | 501.49                                      | 144.94                                      | 356.55                                      |
| 333.15                 | 1.4693 | 641.21                                      | 178.67                                      | 462.54                                      | 1.4873                 | 502.83                                      | 144.69                                      | 358.14                                      |

<sup>a</sup>Relative uncertainties ( $u$ ) expressed in terms of temperature as  $u(T) n_D = \pm 0.02$  K; for  $u(n_D) = \pm 0.0004$  and for  $u(p) = \pm 1.0$  kPa.
